# Supplementary material
Source: Springer Nature journal article supplement (https://www.springermedizin.de/resource/supplementary/40345_2013_21_MOESM1_ESM.pdf/25658314)
Supplement: MOESM1 [file 25658314]

# M.I.N.I.

## Mini International Neuropsychiatric Interview

### (Hypo-) Manic Episode “with Mixed Features” - DSM-5 module

#### PATIENT VERSION

The *Mini International Neuropsychiatric Interview*, better known as the *M.I.N.I.*, is a Structured Diagnostic Interview. It was developed during a close Franco-American partnership that began in 1992 to assist clinicians to conduct psychiatric diagnoses most often encountered, by using the criteria of international classifications (ICD-10 and DSM-IV). It has now become a benchmark in both research and clinical practice. It has been translated into 65 languages. The original *M.I.N.I.* contains 17 modules.

The present module was developed to evaluate the DSM-5 specifier “with Mixed features” for (hypo-)manic episodes.

This version can be filled in by patients.

#### Rating

For this patient version, a point system was introduced based on one point for each YES answer selected. For questions n° 2, 4 and 5, one point is given if the patient answers Yes to either a or b, or both.

#### Diagnostic algorithm

If the total number of points is equal to or greater than 3, the patient presents a *probable* (Hypo-) Manic Episode *with Mixed Features*.

To confirm the diagnosis, ensure that the mixed symptoms are observable by others and represent a change from the person’s usual behavior and that the mixed symptoms are not due to the direct physiological effects of a substance (e.g., a drug of abuse, a medication, or other treatment).

Note: The *M.I.N.I.* is a tool to **help** diagnosis but cannot replace a thorough clinical examination.

**The below questions refer to symptoms people might experience either simultaneously or fluctuating with manic symptoms, during a manic episode.**

**Please read each question carefully.**

**If the question describes symptoms you have experienced almost every day since the beginning of your current manic episode, circle YES.**

**If the question does not describe how you have been feeling, or if you are in doubt, circle NO.**

***(Ignore the grey areas)***

|                                                                                                                                                                                                                                   |                                                                                                             |    |     | POINTS<br><i>Do not fill in</i>       |
|-----------------------------------------------------------------------------------------------------------------------------------------------------------------------------------------------------------------------------------|-------------------------------------------------------------------------------------------------------------|----|-----|---------------------------------------|
| Since you have been experiencing your current manic episode, have you almost every day had times when:                                                                                                                            |                                                                                                             |    |     |                                       |
| 1                                                                                                                                                                                                                                 | ▪ You felt sad, empty, tearful, down, or depressed?                                                         | NO | YES | <input checked="" type="checkbox"/> 1 |
| 2a                                                                                                                                                                                                                                | ▪ You were less interested in most activities?                                                              | NO | YES |                                       |
| 2b                                                                                                                                                                                                                                | ▪ You had less pleasure doing the activities you used to enjoy?                                             | NO | YES | <input checked="" type="checkbox"/> 1 |
| 3                                                                                                                                                                                                                                 | ▪ You were slowed down in your speech, thoughts, or movements?                                              | NO | YES | <input checked="" type="checkbox"/> 1 |
| 4a                                                                                                                                                                                                                                | ▪ You had fatigue?                                                                                          | NO | YES |                                       |
| 4b                                                                                                                                                                                                                                | ▪ You felt without energy?                                                                                  | NO | YES | <input checked="" type="checkbox"/> 1 |
| 5a                                                                                                                                                                                                                                | ▪ You had feelings of worthlessness?                                                                        | NO | YES |                                       |
| 5b                                                                                                                                                                                                                                | ▪ You felt excessively guilty?                                                                              | NO | YES | <input checked="" type="checkbox"/> 1 |
| 6                                                                                                                                                                                                                                 | ▪ You wished you were dead, considered hurting yourself, made plans to commit suicide or attempted suicide? | NO | YES | <input checked="" type="checkbox"/> 1 |
| TOTAL =                                                                                                                                                                                                                           |                                                                                                             |    |     |                                       |
|  <b>IF THE TOTAL NUMBER OF POINTS IS EQUAL TO OR GREATER THAN 3, THE PATIENT PRESENTS A PROBABLE (HYPO-) MANIC EPISODE WITH MIXED FEATURES</b> |                                                                                                             |    |     |                                       |
